# Supplementary material
Source: publisher figshare collection journal article supplement (https://acs.figshare.com/ndownloader/files/14381612)
Supplement: Supplementary file 1 [file 14381612]

1 **Supporting Information**

2

3 **Investigation of Matrix Effects in Laboratory Studies of Catalytic**

4 **Ozonation Processes**

5 *Submitted by*

6 **Wenwen Yang and Tingting Wu\***

7 Department of Civil and Environmental Engineering, The University of Alabama in Huntsville,  
8 Huntsville, Al, 35899, USA

9

10 \* Corresponding author:

11 Email: [Tingting.Wu@uah.edu](mailto:Tingting.Wu@uah.edu) (T. Wu); Tel: +1-256-824-6423

12

13

14

15

16

17

18 **This file includes:**

19 Text S1 and Text S2

20 Figure S1 to S6

26 Text S1: Metal loading test

27 The metal (Cu, Fe, Mn) loading on the prepared catalysts was measured by soaking 1 g of catalysts  
28 in 10 ml 65% nitric acid for 24 h at ambient temperature to dissolve the metal oxide from the  
29 support. The solid was filtered out and the metal concentrations in the solution was measured using  
30 Hach method 8506 (Cu, 0.04 – 5.00 mg/L), 8008 (Fe, 0.02 – 3.00 mg/L), and 8034 (Mn, 0.1 – 20  
31 mg/L), after necessary dilutions

32

33 Text S2: Ozone decomposition experiments

34 1L ozone saturated solution was prepared in a 1L Erlenmeyer flask by continuously feeding ozone  
35 gas into the container. The saturated ozone solution was then quickly transferred into five 100 mL  
36 Erlenmeyer flasks (previously rinsed with ozone saturated water) to obtain 50 mL ozone solution  
37 in each flask which was sealed with a ground glass stopper and stirred magnetically. The dissolved  
38 ozone concentration ( $\text{DO}_3$ ) in each flask was measured after a specific time interval (e.g. flask 1:  
39 5 min, flask 2: 10 min etc.). In order to check if the ozone desorption into the headspace was  
40 significant or not, we tested  $\text{DO}_3$  evolution of ozone solution in the 100 mL flasks prepared as  
41 described above, as well as  $\text{DO}_3$  evolution in the 1 L flask, i.e., without any solution transfer. As  
42 shown in the Figure S1, the  $\text{DO}_3$  profiles under these two conditions are similar, indicating the  
43 effect of ozone desorption was not pronounced here.

44

45

46

47

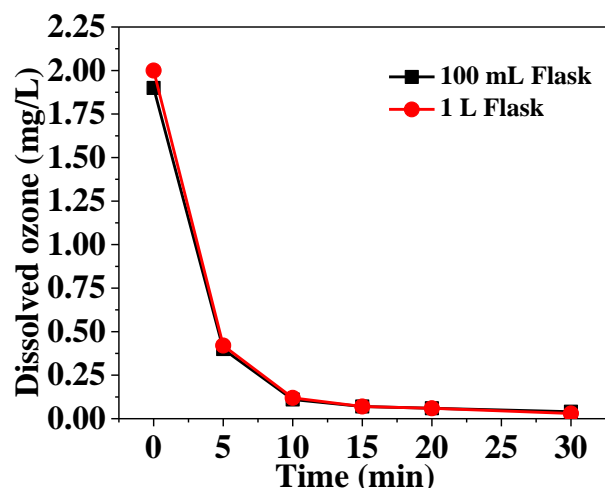

48

49 Figure S1. Comparison of the dissolved ozone concentration in different flask. [Initial pH = 7.00  
50 ± 0.20]

51

52

53

54

55

56

57

58

59

60

61

62

63

64

65

66

67

68

69

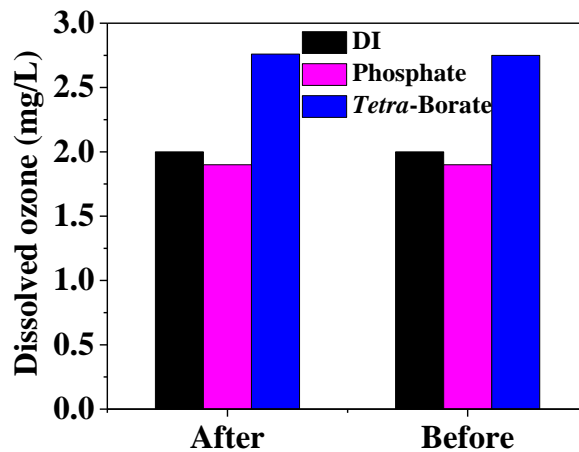

70  
 71 Figure S2. Comparison of the dissolved ozone concentration before and after filtration. [Initial  
 72 pH = 7.00 ± 0.20].

73  
 74  
 75  
 76  
 77  
 78  
 79  
 80  
 81  
 82  
 83  
 84  
 85  
 86  
 87  
 88  
 89  
 90  
 91

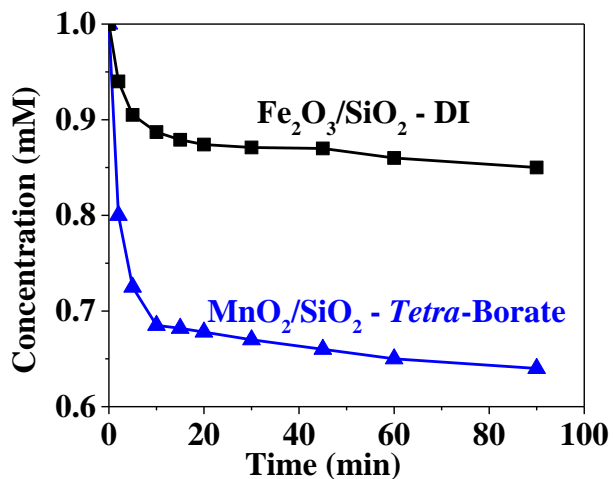

92

93 Figure S3. Oxalate degradation during longer experiment runs of Fe<sub>2</sub>O<sub>3</sub>/SiO<sub>2</sub> in DI water and  
94 MnO<sub>2</sub>/SiO<sub>2</sub> in *tetra*-borate buffered solution. [Initial concentration: Oxalate, 1 mM, working  
95 solution: 200 mL, heterogeneous catalyst dose: 0.50 g, initial pH = 7.00 ± 0.20].

96

97

98

99

100

101

102

103

104

105

106

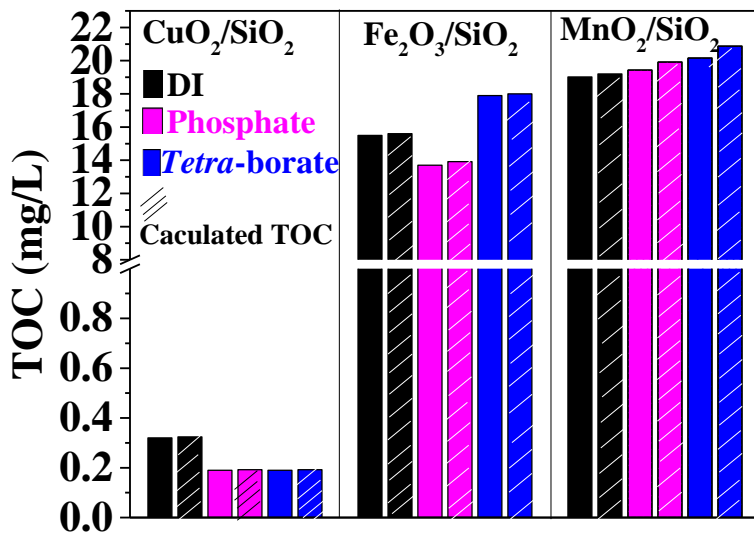

107  
 108 Figure S4. Measured TOC vs calculated TOC of OA after 30 min treatment. [Initial OA: 1.0 mM;  
 109 working solution: 200 mL; catalyst does: 500 mg; pH = 7.00 ± 0.20]

110  
 111  
 112

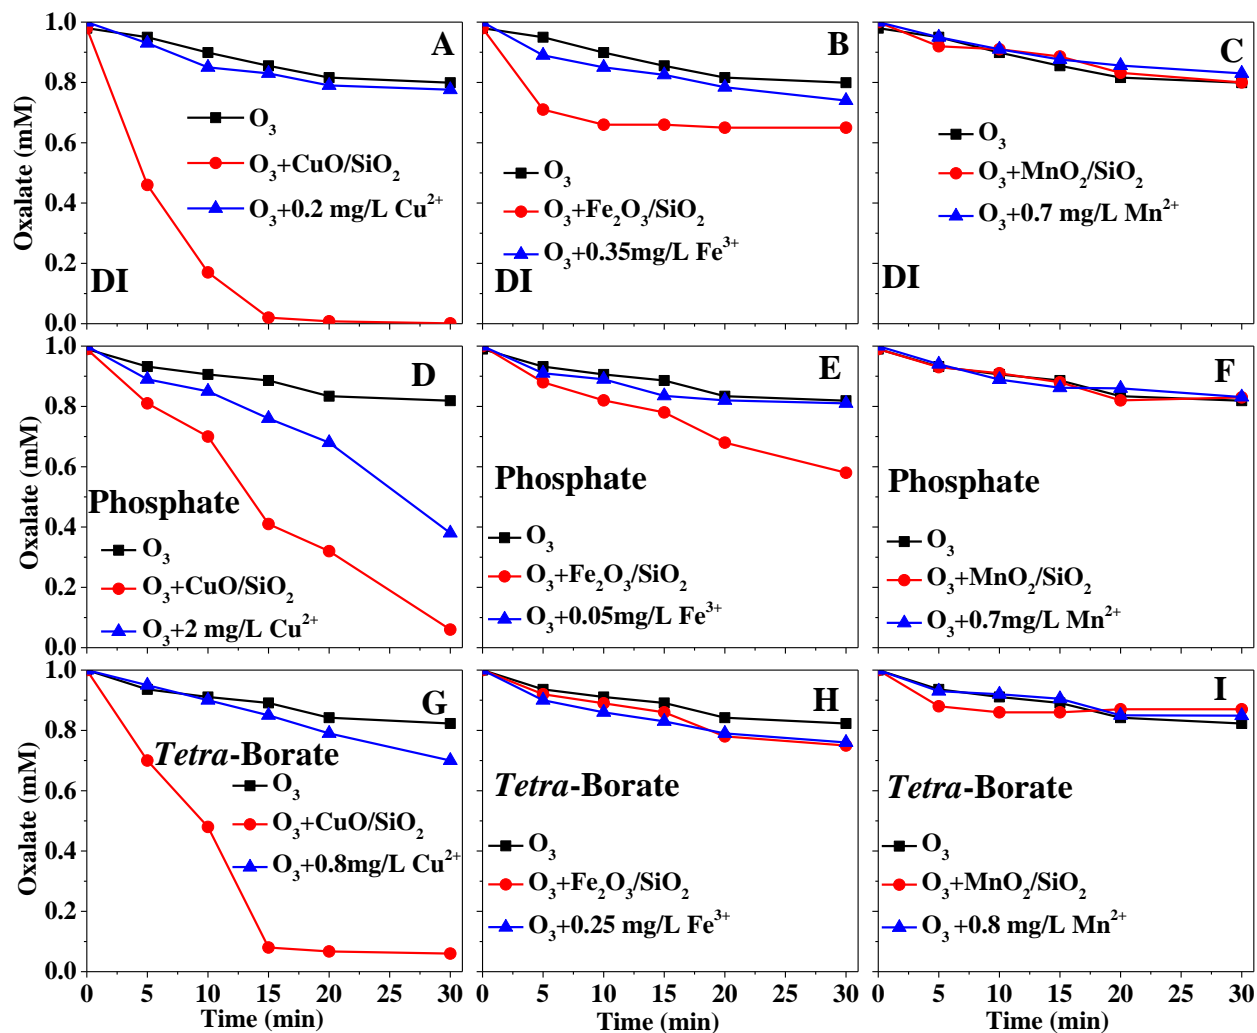

113

114 Figure S5. Comparison of heterogeneous and homogeneous catalytic ozonation. [Initial  
 115 concentration: oxalate: 1 mM, working solution: 200 mL, initial pH = 7.00 ± 0.20, metal ion  
 116 concentration: leached metal measured at 15 min].

117

118

119

120

121

122

123

124

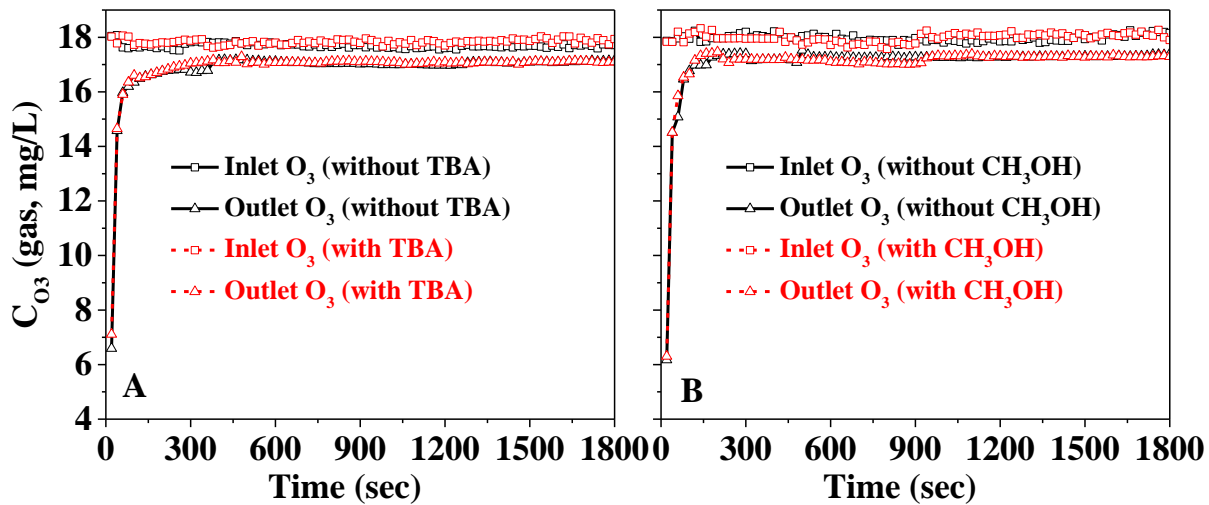

125

126 Figure S6. Comparison of the gas ozone in the feeding line and off gas line during the runs with  
 127 and without TBA/ $CH_3OH$  (methanol) [Initial pH =  $7.00 \pm 0.20$ ].

128

129
